# Supplementary material for: Protein phosphatase 2A is crucial for sarcomere organization in Caenorhabditis elegans striated muscle
Source: PubMed Central journal article supplement — Mol Biol Cell. 2018 Aug 15;29(17):2084–97. doi: 10.1091/mbc.E18-03-0192 (PMC6232960; doi:10.1091/mbc.e18-03-0192), 2018-08-15
Supplement: mbc-29-2084-s001.pdf [file mbc-29-2084-s001.pdf]

# Supplemental Materials

*Molecular Biology of the Cell*

Qadota et al.

# Figure S1

UNC-89-B (8081 aa)

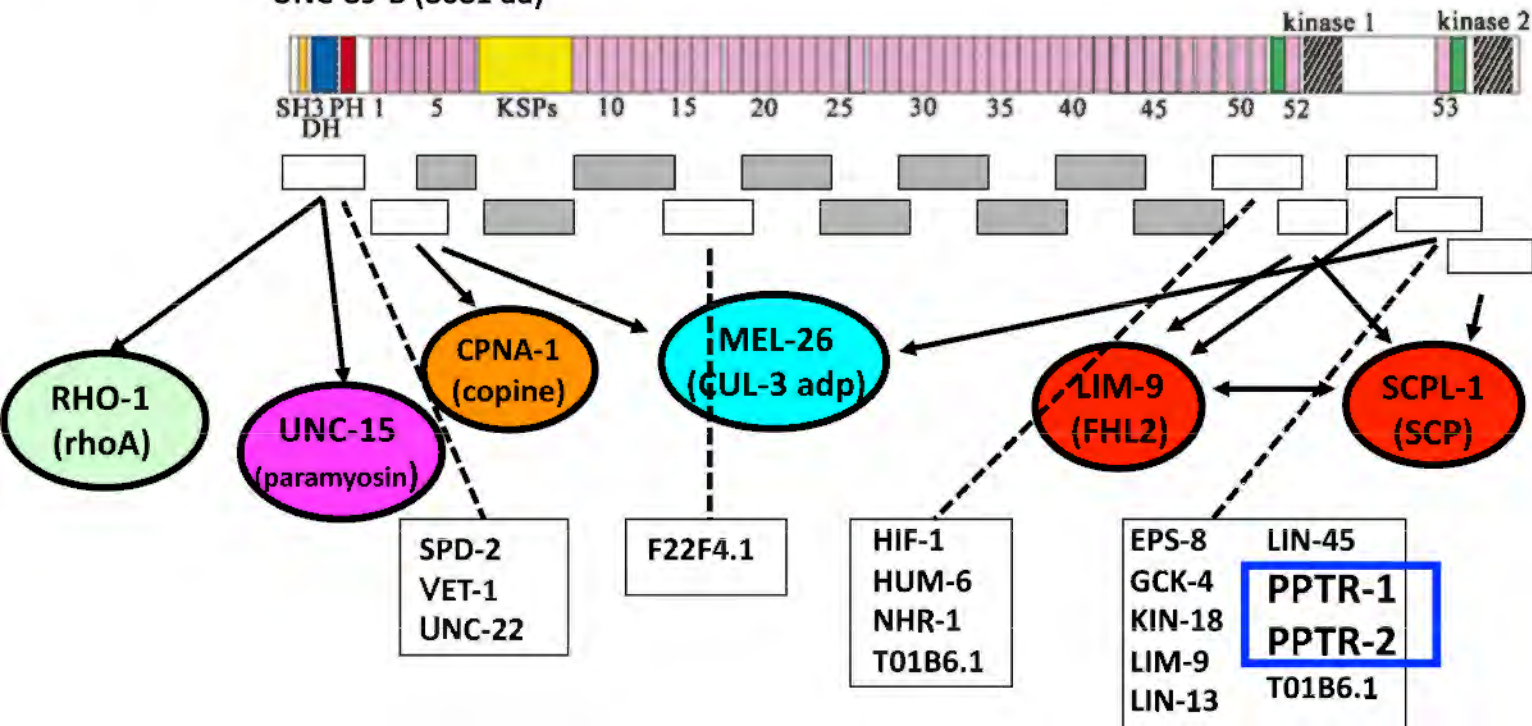

Figure S2

A: alignment of *C. elegans* PPTR-1 and PPTR-2, human B56alpha, B56beta, B56gamma, B56delta, and B56epsilon

```
B56alpha -----MSSSSPPAGAASA
B56epsilon -----MSSAPT
B56beta -----METKLPPASTPTSPSSPGLS
PPTR-1 -----MHGSGHSLTGAPHQIPPPRTQGAATGGQQL
B56gamma -----
B56delta MPYKLLKKEKEPPKVAKCTAKPSSSGKGGGENTEAAQPQPQPQPQAQSQPPSSNKRPS
PPTR-2b -----MIPADAPP
```

```
B56alpha AISASEKVDGFRKSVRKAQRQKRSQGSQFRSQGSQAEHLPLPQLKDATSNEQQELFCQ
B56epsilon TPPSVDKVDGFSRKSVRKAR-QKRSQSSSQFRSQGKPIELTPLPLLKDVPSSEQPELFLK
B56beta PVPPPDKVDGFSRRSLRRAR-PRRSHSSSQFRYQSNQQELTPLPLLKDVFASELHELLSR
PPTR-1 SATANQFVDKIDPFHNKRGTSRRLRINNSRYNVDSAQELVQLALIKDTAANEQPALVIE
B56gamma -----MVVDAANSNGPFQPVVLLHIRDVFPADQEKLFIQ
B56delta NSTPPPTQLSKIKYSGGPQIVKKERRQSSSRFNLSKNRELQKLPALKDSPTQEREELFIQ
PPTR-2b PTNIGRTNTYGGDLISGPVIPRRERRQSSSMFNISQNRELQRLPAIKDADPSERETLEFIQ
. . . : * : * . : * . .
```

```
B56alpha KLQCCILDFDM-DSVSDLKSKEIKRATLNELVEYVSTN-RGVIVESAYSDIVKMISANI
B56epsilon KLQCCVIFDFM-DTSLDLKMKKEYKRSTLNELVDYITIS-RGCLTEQTYPEVVRMVSCNI
B56beta KLAQCGVMFDFL-DCVADLKGKEVKRAALNELVECVGST-RGVLIEPVYPDIIRMISVNI
PPTR-1 KLVQCCQHVDFDY-DPVAQLKCKEIKRAALNELIDHITST-KGAIVETIYPAVIKMKVAKNI
B56gamma KLRQCCVLFDFVSDPLSDLKWEVKRAALSEMVEYITHN-RNVITEPIYPEVVHMFVAVNM
B56delta KLRQCCVLFDFVSDPLSDLKFKVEVKRAGLNEMVEYITHS-RDVVTEAIYPEAVTMFVSNL
PPTR-2b KLRQCCVVFDFANDALSDLKFKVEVKRAALNELVDHVS GAPKGSLSDAVYPEAIGMFSTNL
** ** :*** * :*:** ** **: *.*:*: : :. : : *. :*.* :
```

```
B56alpha FRTLPPSDN---PDFDPEEDEPTLEASWPHIQLVYEFFLRFLESPDFRPSIAKRYIDQKF
B56epsilon FRTLPPSDS---NEFDPEEDEPTLEASWPHLQLVYEFFLRFLESQEFQPSIAKRYIDQKF
B56beta FRTLPPSEN---PEFDPEEDEPNLEPSWPHLQLVYEFFLRFLESPDFQPSVAKRYVDQKF
PPTR-1 FRVLPPSEN---CEFDPEEDEPTLEVSWPHLQLVYELFLRFLESPDFQASIGKKYIDQRF
B56gamma FRTLPPSSNPTGAEFDPEEDEPTLEAAWPHLQLVYEFFLRFLESPDFQPNIAKRYIDQKF
B56delta FRTLPPSSNPTGAEFDPEEDEPTLEAAWPHLQLVYEFFLRFLESPDFQPNIAKRYIDQKF
PPTR-2b FRPLSPPTNPIGAEFDPEEDEPTLEAAWPHLQLVYEFFLRFLECPDFQSQVAKRYIDQNF
** *.*. . :***:****.*** :***:*****:*.****. :*:...*:**.* *
```

```
B56alpha VQQLLELFDSEDPREDFLKTTLHRIYGKFLGLRAFIRKQINNIFLRFIYETEHFNGVAE
B56epsilon VLQLELFDSEDPREDFLKTTLHRIYGKFLGLRAFIRKQINNIFLRFVYETEHFNGVAE
B56beta VLMLLELFDSEDPREDFLKTTLHRIYGKFLGLRAYIRKQCNHIFLRFIYEFEHFNGVAE
PPTR-1 VLKLLDLFDSEDPREDFLKTTLHRIYGKFLGLRAFIRKHINMMFLRFVYETDSFNGVGE
B56gamma VLQLELFDSEDPREDFLKTTLHRIYGKFLGLRAYIRKQINNIFYRFIYETEHNGIAE
B56delta VLALLDLFDSEDPREDFLKTTLHRIYGKFLGLRAYIRKQINNIYRFIYETEHNGIAE
PPTR-2b ILRLLMIMDSEDPREDFLKTTLHRIYGKFLGHRAYIRKQINNIFYSFIYETERHNGIAE
: ** :*:*****:*** ***:***** **:***: :*: * ** : .**.* *
```

```
B56alpha LLEILGSIINGFALPLKAEHKQFLMKVLI PMHTAKGLALFHAQLAYCVVQFLEKDTTLTE
B56epsilon LLEILGSIINGFALPLKAEHKQFLVKVLIPLHTVRSLSLFHAQLAYCIVQFLEKDPSTLE
B56beta LLEILGSIINGFALPLKTEHKQFLVRVLIPLHSVKLSLVFHAQLAYCVVQFLEKDATLTE
PPTR-1 LLEILGSIINGFALPLKQEHKVFLVKVLLPLHKPKCLSLSYHAQLAYCVVQFIEKDSSTLP
B56gamma LLEILGSIINGFALPLKEEHKIFLLKVLLPLHKVKSLSVYHPQLAYCVVQFLEKDTTLTE
B56delta LLEILGSIINGFALPLKEEHKMFLIRVLLPLHKVKSLSVYHPQLAYCVVQFLEKESSTLE
PPTR-2b LLEILGSIINGFALPLKEEHKTFLLRVLLPLHKVKSLSVYHPQLAYCVVQFIEKDSSTLE
***** ** **:***:*. : :*:*.*****:***:***:***:***
```

B56alpha PVIRGLLKFWPKTCSQKEVMFLGEIEEILDVIEPTQFKKIEEPLFKQISKCVSSSHFQVA  
 B56epsilon PVIRGLMKFWPKTCSQKEVMFLGELEEEILDVIEPSQFVKIQEPLFKQIAKCVSSPHFQVA  
 B56beta HVIRGLLKYWPKTCTQKEVMFLGEMEEILDVIEPSQFVKIQEPLFKQVAVCVSSPHFQVA  
 PPTR-1 QVFEALLKFWPRTCSSKEVMFLGEVEEILDIEPEQFKKIIDPLFRQLAKCVSSPHFQVA  
 B56gamma PVVMALLKYWPKTHSPKEVMFLNELEEEILDVIEPSEFVKIMEPLFRQLAKCVSSPHFQVA  
 B56delta PVIVGLLKFWPKTHSPKEVMFLNELEEEILDVIEPSEFVKIMEPLFRQLAKCVSSPHFQVA  
 PPTR-2b PVISGMLRFWPKQHSPKEVMFLNELEEVLDVIEPNEFQKIMTPLFSQIARCVSSPHFQVA  
 \* . . : : : \* \* : : \* \* \* \* \* . \* : \* \* : \* \* \* \* \* : \* \* : \* \* \* \* \* : : \* \* \* \* \* . \* \* \* \* \*

B56alpha ERALYFWNNEYILSLIEENINKILPIMFASLYKISKEHWNPTIVALVYNVLKTLMEMNGK  
 B56epsilon ERALYYWNNEYIMSLIEENSIVLIPIMFSSLYRISKEHWNPAIVALVYNVLKAFMEMNST  
 B56beta ERALYFWNNEYILSLIEDNCHTVLPAVFGTLYQVSKEHWNQTIVSLIYNVLKTFMEMNGK  
 PPTR-1 ERALYFWNNEYILSLIEDTSSLVMPIMFPALYRISKEHWNQTIVALVYNVLKTFMEMNGK  
 B56gamma ERALYYWNNEYIMSLISDNAAKILPIMFPALYRNSKTHWNKTIHGLIYNALKLFMEMNQK  
 B56delta ERALYYWNNEYIMSLISDNAARVLPIMFPALYRNSKSHWNKTIHGLIYNALKLFMEMNQK  
 PPTR-2b ERALYYWNNEYVMSLVADNARV IIPIMFPVLFKNSKSHWNKTIHGLIYNALKMFMEMNQK  
 \* \* \* \* \* : \* \* \* \* \* : \* \* \* \* \* : . . : : \* \* : \* \* : \* \* \* \* \* : \* . \* : \* \* . \* \* : \* \* \* \* \* .

B56alpha LFDLDTSSYKAERQREKKKELEREELWKKLEELKLLKKALEKQNSAYNMHSILSNTSAE--  
 B56epsilon MFDELATYKSDRQREKKKEREELWKKLEDELKRLRRDGI IPT-----  
 B56beta LFDLDTASYKLEKQQEQQAQERQELWQGLEELRLRRLQGTQGAKEAPLQRLTPQVAASG  
 PPTR-1 LFDLDTSTYKGERLREKQREKDRDAFWKKMEALELNP AEGKEVTPSLFPEKLTLDYLLKKD  
 B56gamma LFDLDTQQYKAEKLEKLEKMKEREAAWVKIENLAKANPQVLKKRIT-----  
 B56delta LFDLDTQQYKAEKQKGRFRMKEREEMWQKIEELARLNPQYPMFRAPPPLPVYVSMETETP  
 PPTR-2b LFDECSQAYQKDRVQEKTLNEEKERIWNNEIEKQAMGNPQYVEVKALFARFNPDEI ISSRQ  
 : \* \* : : : : : : : : : : : : : : \* : \* : \*

B56alpha -----  
 B56epsilon -----  
 B56beta GQS-----  
 PPTR-1 GPNMTPLPVATAGGGDKSPSVVKKSSSTGSETTTPAKK-----  
 B56gamma -----  
 B56delta TAEDIQLLKRVTETEAVQMLKDIKKEKVL-----RRKSELQDQVYTIKALEAHKRA  
 PPTR-2b QNGVDENMKTSTVLSKDEILKNAVGVSSMKNDMDFGPNHKQSDFPPEQTTRALGEYKRR

B56alpha -----  
 B56epsilon -----  
 B56beta -----  
 PPTR-1 -----  
 B56gamma -----  
 B56delta EEFLTASQEAL--  
 PPTR-2b DPFLKKVTSTDEQ

**B: % identities**

PPTR-1 to PPTR-2: 55% (12-506)  
 PPTR-1 to B56alpha: 78% (39-458)  
 PPTR-1 to B56beta: 66% (39-480)  
 PPTR-1 to B56gamma: 67% (71-490)  
 PPTR-1 to B56delta: 66% (52-482)  
 PPTR-1 to B56epsilon: 67% (38-492)  
 PPTR-2 to B56alpha: 64% (30-441)  
 PPTR-2 to B56beta: 64% (35-460)  
 PPTR-2 to B56gamma: 74% (54-470)  
 PPTR-2 to B56delta: 65% (5-552)  
 PPTR-2 to B56epsilon: 67% (47-441)

# Figure S3

## PPTR-1

1 73 **B56** 478 543

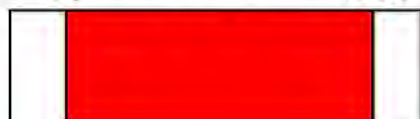

001, 045,  
081, 3-3-1

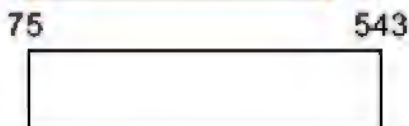

## PPTR-2b

1 51 462 561

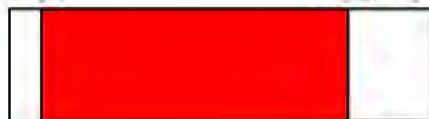

19n3-1

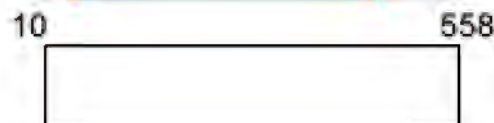

27:2-1

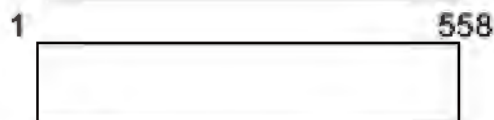

**isolated clones of  
PPTR-1, and PPTR-2**

# Figure S4

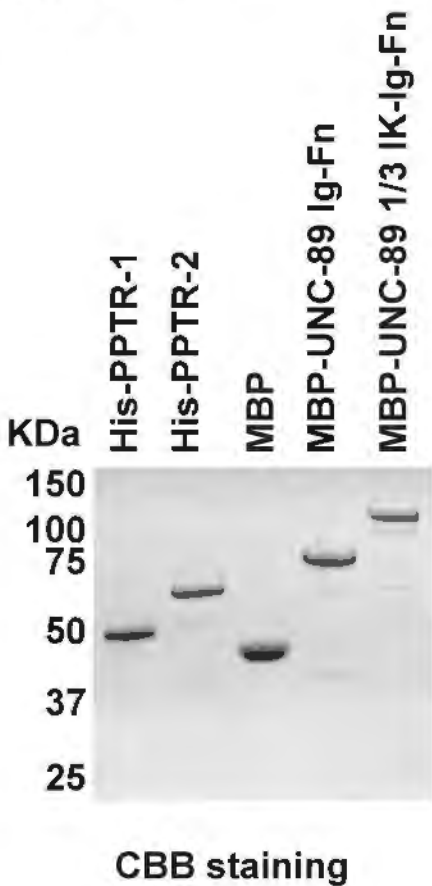

**Figure S5**

**Wild type**

***pptr-1(tm3103)***

**Actin**

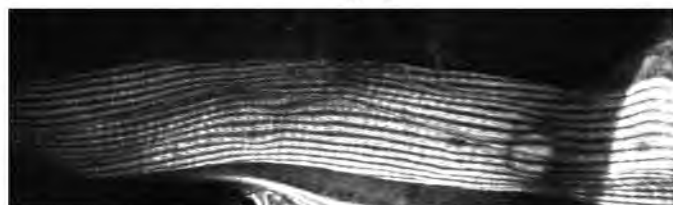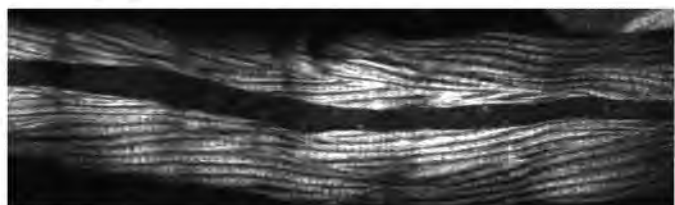

**ATN-1**

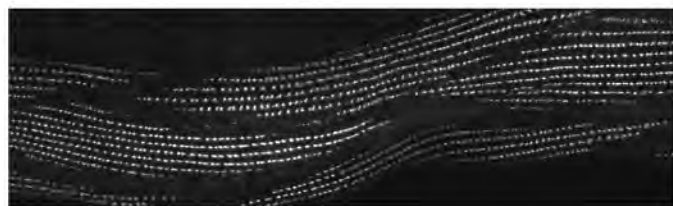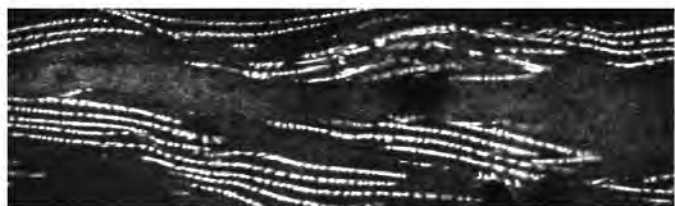

**MHC B**

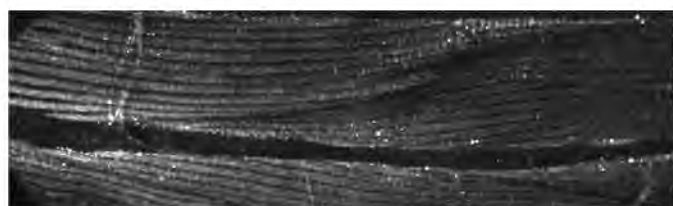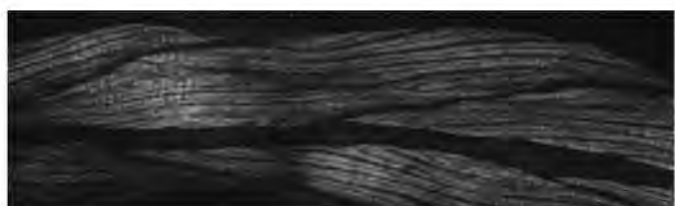

**UNC-15**

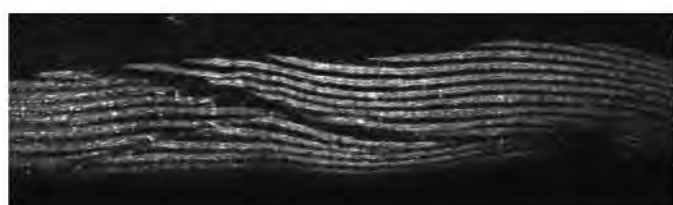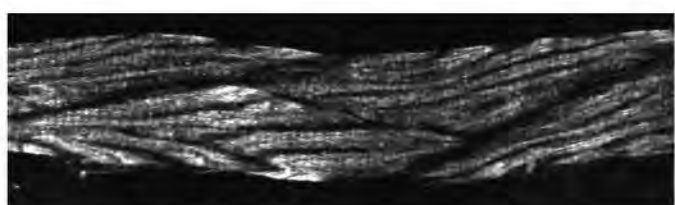

**UNC-89**

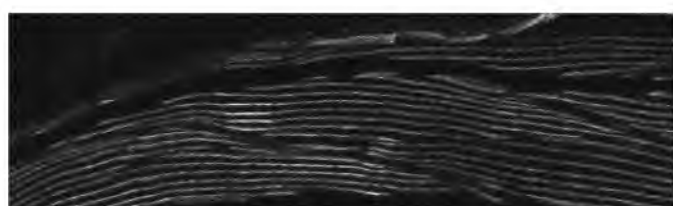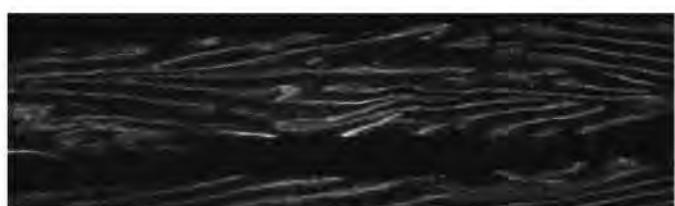

**UNC-95**

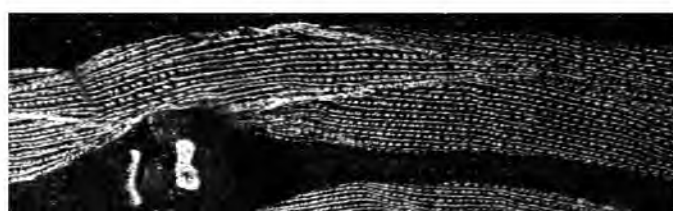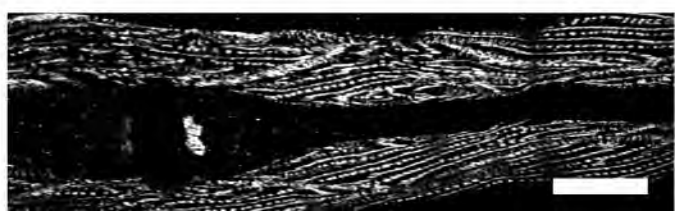

**Figure S6. Alignment of MHC A and MHC B sequences with phosphorylation sites**

|       |     |                                                               |     |
|-------|-----|---------------------------------------------------------------|-----|
| MHC A | 9   | ENDPGFPFLGISREARAATAARPFDSKKNCWIPDPEDGFVAAEIQSTTGEQVTVVTVKGN  | 68  |
|       |     | E DPG+ +L +RE ++P+DSKKN WIPDPE+G++A EI +T G+QVT+VT +GN        |     |
| MHC B | 4   | EKDPGWQYLRRRTREQVLEDQSKPYDSKKNWIPDPEEGYLAGEITATKGDQVTIVTARGN  | 63  |
| MHC A | 69  | QITVKKDQCQEMNPPKFDKTEDMANLTFLEASVLGNLKDRLMIYTYSGLFCVWINP      | 128 |
|       |     | ++T+KK+ QEMNPPKF+KTEDM+NL+FLN+ASVL NL+ RY ++IYTYSGLFCVWINP    |     |
| MHC B | 64  | EVTLLKELVQEMNPPKFEKTEDMSNLSFLNDASVLHNLRSRYAAMLIYTYSGLFCVWINP  | 123 |
| MHC A | 129 | YKRLPIYSESVIKHFMGKRRNEMPPHLFAVSDEAYRNMVQDKENQSMELITGESGAGKTEN | 188 |
|       |     | YKRLPIY++S + FMGKR+ EMPPHLFAVSDEAYRNM+QD ENQSMELITGESGAGKTEN  |     |
| MHC B | 124 | YKRLPIYTDSCARFMGKRKTEMPPHLFAVSDEAYRMLQDHENQSMELITGESGAGKTEN   | 183 |
| MHC A | 189 | TKKVISYFAIVGATQAASGKEAKDGKGGTLEEQIVQTNPVLEAFGNAKTVRNNSRFRG    | 248 |
|       |     | TKKVI YFA VGA+Q G E KK TLE+QIVQTNPVLEAFGNAKTVRNNSRFRG         |     |
| MHC B | 184 | TKKVICYFAAVGASQQEGGAEVDPNKKKVTLEDQIVQTNPVLEAFGNAKTVRNNSRFRG   | 243 |
| MHC A | 249 | KFIRTHFSGSGLAGGDIEHYLLEKSRVVRQAPGERCYHIFYQIMSGNDPSLRGKLLSN    | 308 |
|       |     | KFIR HF+ G+LA DIEHYLLEKSRV+RQAPGERCYHIFYQI S P L+ +L L        |     |
| MHC B | 244 | KFIRIHFNKHGRLASCDIEHYLLEKSRVIRQAPGERCYHIFYQIYSDFRPELKKELLLDL  | 303 |
| MHC A | 309 | DITYYHFCSQAELTIEGMDDKEEMRLTQEAFDIMGFEDNETMDLYRSTAGIMHMGEMKFK  | 368 |
|       |     | I Y F +QAEL I+G+DD EE +LT EAFDI+ F E D YR + MHMG MKFK         |     |
| MHC B | 304 | PIKDYWFVAQAELIIDGIDDVEEFQLTDEAFDILNFSAVEKQDCYRLMSAHMHMGNMKFK  | 363 |
| MHC A | 369 | QRPREEQAEPDGEEDALNAAAMLGIAEEFLKALTKPRVRVGTEWVNKGQNLEQVNWAVS   | 428 |
|       |     | QRPREEQAEPDG ++A A+ M GI EEFLKALTKPRV+VGTEWV+KGQN EQVNWAV     |     |
| MHC B | 364 | QRPREEQAEPDGTDEAEKASNMYGIGCEEFLKALTKPRVKVGTEWVSKGQNCEQVNWAVG  | 423 |



|       |     |                                                               |     |
|-------|-----|---------------------------------------------------------------|-----|
| MHC A | 429 | GLAKAIYARMFKWIITRCNKTLDAKEIERKHFIVGLDIAGFEIFDLNSFEQLWINFVNER  | 488 |
|       |     | +AK +Y+R+F W++ +CN TLD K I+R +FIGVLDIAGFEIFD NSFEQLWINFVNE+   |     |
| MHC B | 424 | AMAKGLYSRVFNWLVKKCNLTLDQKGIDRDYFIGVLDIAGFEIFDFNSFEQLWINFVNEK  | 483 |
| MHC A | 489 | LQQFFNHMHMFVLEQEEYKREGIAWTFIDFGLDLQACIELIEKPLGIISILDEECIVPKAT | 548 |
|       |     | LQQFFNHMHMFVLEQEEY REGI W FIDFGLDLQACIELIEKPLGIIS+LDEECIVPKAT |     |
| MHC B | 484 | LQQFFNHMHMFVLEQEEYAREGIQWVFIDFGLDLQACIELIEKPLGIISMLDEECIVPKAT | 543 |
| MHC A | 549 | DMTYAQKLLDQHLGKHPNFQKPKPPKQGDHFAIVHYAGTVRYNATNFLEKNKDPLND     | 608 |
|       |     | D+T A KL+DQHLGKHPNF+KPKPPKQGDHFAIVHYAGTVRYN N+LEKNKDPLND      |     |
| MHC B | 544 | DLTLASKLVDQHLGKHPNFEKPKPPKQGEAHFAMRHYAGTVRYNCLNWLEKNKDPLND    | 603 |
| MHC A | 609 | TAVALLKHSTDNSLMLDIWQDYQTQEEAAEAAGQTAGGKRGKSSSFATVSMIYRESLN    | 668 |
|       |     | T V+ +K S N L+++IWQDY TQEEAA AK G G K+GKS SF TVSM+YRESLN      |     |
| MHC B | 604 | TVVSAMKQSKGNDLLVEIWQDYTTQEEAAAKAKEGGGGGKKGKSGSFMTVSMIYRESLN   | 663 |
| MHC A | 669 | NLMNMLYQTHPHFIRCIIPNEKKASGVIDSALVLNQLTCNGVLEGIRICRKGFPNRMLYP  | 728 |
|       |     | NLM ML +THPHFIRCIIPNEKK SG+ID+ALVLNQLTCNGVLEGIRICRKGFPNR L+P  |     |
| MHC B | 664 | NLMTMLNKTHPHFIRCIIPNEKKQSGMIDAALVLNQLTCNGVLEGIRICRKGFPNRTLHP  | 723 |
| MHC A | 729 | DFKHRYAILAADAAC-ESDPKKASVGILDKISVDGNLTDEEFKVGETKIFFKAGVLAKLE  | 787 |
|       |     | DF RYAILAA AK + D KK + I+ K+ DG+L++E F++G TK+FFKAGVLA LE      |     |
| MHC B | 724 | DFVQRYAILAAKEAKSDDDKKCAEAIMSKLVNDGSLSEEMFRIGLTKVFFKAGVLAHLE   | 783 |
| MHC A | 788 | DLRDEILSRIVTMFQSRIRSYLAKAEVRRRYEQQTGLLVQRNVRWCTLRTWEWFKLFG    | 847 |
|       |     | D+RDE L+ I+T FQS+IR +L + +RR EQ+ GLL+VQRNVR+WCTLRTWEWFKL+G    |     |
| MHC B | 784 | DIRDEKLATILTFQSQIRWHLGLKDRKRRMEQRAGLLIVQRNVRWCTLRTWEWFKLYG    | 843 |

MHC A 848 KVKPMLKAGKEQEAMGELAVKIQKLEEAQVQRGEIARSQLESQVADLVEEKNALFLSLETE 907  
KVKPMLKAGKE E + ++ K++ LE+++ + E R +LE A LVEEK +LF +LE+

MHC B 844 KVKPMLKAGKEAEELEKINDKVKALEDSLAKKEEKLKEEESAKLVEEKTSLFTNLEST 903

MHC A 908 KANLADAEERNEKLNQLKATLESKLSIDITGQLEDMQERNEDLARQKKKTDQELSDTKKHV 967  
K L+DAEER KL + +LS++ QL D ++R D+ R KKK + E+ KK +

MHC B 904 KTQLSDAEERLAKLEAQQKDASKQLSELNDQLADNEDRTADVQRAKKKIEAEVEALKKQI 963

MHC A 968 QDLELSLRKAEQEQSRDHNIRSLQDEMANQDEAVAKLNKEKKHQEESNRKLNEDLQSEE 1027  
QDLE+SLRKAE EKQS+DH IRSLQDEM QDEA+AKLNKEKKHQEE NRKL EDLQSEE

MHC B 964 QDLEMSLRKAESEKQSKDHQIRSLQDEMQQDEATAKLNKEKKHQEEINRKLMEQLQSEE 1023

MHC A 1028 DKVNHLEKIRNKLEQQMDELEENIDREKRSRGDIEKAKRKVEGDLKVAQENIDEITKQKH 1087  
DK NH K++ KLEQ +D+LE++++REKR+R D++K KRKVEG+LK+AQENIDE +Q+H

MHC B 1024 DKGHNQNKVKAKLEQTLDDLEDLEKRRARADLDKQKRKVEGELKIAQENIDESGRQRH 1083

MHC A 1088 DVETTLKRKEEDLHHTNAKLAENNSIIAKLQRLIKELTARNAELEELEAERNRQKSDR 1147  
D+E LK+KE +LH +++L + ++++KLQR IK+ +R +ELEELE ER SR K+DR

MHC B 1084 DLENLKKKESELHSVSSRLEDEQALVSKLQRQIKDQSRRISELEELEENERQSRKADR 1143

MHC A 1148 SRSEAERELEELTERLEQQGATAAQLEANKKREAEIAKLRREKEEDSLNHETAISLRK 1207  
++S+ +RELEEL E+L++QGGATAAQ+E NKKREAE+AKLRR+ EE ++NHE + LRK

MHC B 1144 AKSDLQRELEELGEKLDEQGGATAAQVEVNKKREAEAKLRRDLEEMNHNENQLGGLRK 1203

MHC A 1208 RHGDSVAELTEQLETQKLLKAKSEAEKSKLQRDLEESQHATDSEVRSRQDLEKALKTIEV 1267  
+H D+VAELT+QL+ L K KAK E +K++ RD E+ D E + + EK K E+

MHC B 1204 KHTDAVAELTDQLDQLNKAKAKVEKDKAQAVRDAEDLAAQLDQETSGKLNNEKLAKQFEL 1263

MHC A 1268 QYSELQTKADEQSRQLQDFAALKNRLNNSDLNRSLEEMDNQLNSLHRLKSTLQSQLDE 1327  
Q +ELQ+KADEQSRQLQDF +LK RL++EN DL R LE+ ++Q+N L RLKS L SQL+E

MHC B 1264 QLTELQSKADEQSRQLQDFTSLKGRLHSENGDLVRQLEDAESQVNQLTRLKSQLTSQLEE 1323

MHC A 1328 TRRNYDEESRERQALAATAKNLEHENTILREHLDEEAESKADLTRQISKLNAEIQQWKAR 1387  
RR DEE+RERQ +AA AKN +HE L+E L+EE E K ++ RQ+SK NA+IQQWKAR

MHC B 1324 ARRTADEEARERQTVAAQAKNYQHEAEQLQESLEEEIEGKNEILRQLSKANADIQQWKAR 1383

MHC A 1388 FDSEGLNKLEEIEAAKKALQLKVQELTDTNEGLFAKIASQEKVRFKLMQDLDDAQSDVEK 1447  
F+ EGL K +E+E AK+ K+ EL + + +K AS EK + +L+ DLDDAQ DVE+

MHC B 1384 FEGEGLLKADELEDAKRRQAQKINELQEALDAANSKNASLEKTKSRVLVGDLLDDAQVDVER 1443

MHC A 1448 AAAQVAFYEKHRRQFESIIAEWKKKTDLLSSELDAAQDRNQLSTDLEFKAKTANDELAEY 1507  
A + EK ++ F+ II EW+KKTDDL++ELD AQRD R STDLEFKAK A +ELAE

MHC B 1444 ANGVASALEKKQKGFDKIIDEWRKKTDDLAAELDGAQRDLRNTSTDLEFKAKNAQEELAEV 1503

MHC A 1508 LDSTRRENKSLAQEVKDLTDQLGEGGRSVAELQKIVRKLEVEKEELQKALDEAEAALEAE 1567  
++ RRENKSL+QE+KDLTDQLGEGGRSV E+QKI+R+LE+EKEELQ ALDEAEAALEAE

MHC B 1504 VEGLRRENKSLSQEIKDLTDQLGEGGRSVHEMQKIIRRLEIEKEELQHALDEAEAALEAE 1563

MHC A 1568 EAKVLRAQIEVSQIRSEIEKRIQEKEEEFENTRRNHQRALESMQATLEAETKQKEEALRI 1627  
E+KVLRAQ+EVSQIRSEIEKRIQEKEEEFENTR+NH RALESMQA+LE E K K E LRI

MHC B 1564 ESKVLRAQVEVSQIRSEIEKRIQEKEEEFENTRKNHARALESMQASLETEAKGKAELLRI 1623

MHC A 1628 KKKLESNDINDLEIALDHANRAYADAQKTIKKYMETVQELQFQIEEEQRQKDEIREQFLAS 1687  
KKKLE DIN+LEIALDHAN+A ADAQK +K+Y E V+ELQ Q+EEEQR + REQF +

MHC B 1624 KKKLEGDINELEIALDHANKANADAQKLNKRYQEQVRELQLQVEEEQRNGADTREQFFNA 1683

MHC A 1688 EKRNAILQSEKDELAQQAEAAERARRNAEAEICELREQNNDLNAHVSALTGQRRKLEGEL 1747  
EKR +LQSEK+EL EAAERAR+ AE E + R+Q N+ NA VS+LT +RKLEGE+

MHC B 1684 EKRALLLQSEKEELLVANAEEARARKQAEYEAADARDQANEANAQVSSLSAKRKLEGEI 1743

MHC A 1748 LAAHAELEEIANELKNAVEQGGKASADAARLAEELRQEQEHSMHIERIRKGLELQIKEMQ 1807  
A HA+L+E NE K A E+ +KA ADA RLAEELRQEQEHS H++R+RKGLE Q+KE+Q

MHC B 1744 QAIHADLDELNEYKAAEERSKKAIIADATRLAEELRQEQEHSQHVDRLRKGLEQQLKEIQ 1803

MHC A 1808 IRLDDAENAALKGGKKIIAQLEARIRAIQELDGEQRRHQDTEKNWRKAERRVKEVEFQV 1867  
+RLD+AE AALKGGKK+IA+LE R+R +E ELDGEQRR QD KN +A+RRV+E++FQV

MHC B 1804 VRLDEAEAAAALKGGKKVIAKLEQRVRELESELDGEQRRFQDANKNLGRADRRVRELQFQV 1863

MHC A 1868 VEEKKNEERLTELVDKLCCKLKIFKRQVEEAEVAASNLNKYKVLTAQFEQAEERADIAE 1927  
E+KKN ERL +L+DKLQ KLK K+QVEEAE+ NL KYK LT Q E AEERAD AE

MHC B 1864 DEDKKNFERLQDLIDKLQKLTQKQVEEAEELANLNQKYKQLTHQLEDAEERADQAE 1923

MHC A 1928 NALSKMRNKIRASASMAPPDGFPMPVSSALIRSSSNAR 1967  
N+LSKMR+K RASAS+AP + SAS+A+IRS S AR

MHC B 1924 NSLSKMRKSRASVAP----GLOSSAAVIRSPSRAR 1959

### Phosphorylation Sites:

Underlined: sites predicted in Schriefer and Waterston, 1989

Highlighted: sites identified in this study by mass spectrometry

Yellow: specific to *unc-54(s74)*

Red: specific to wild type

Blue: common to wild type and *unc-54(s74)*

# Figure S7

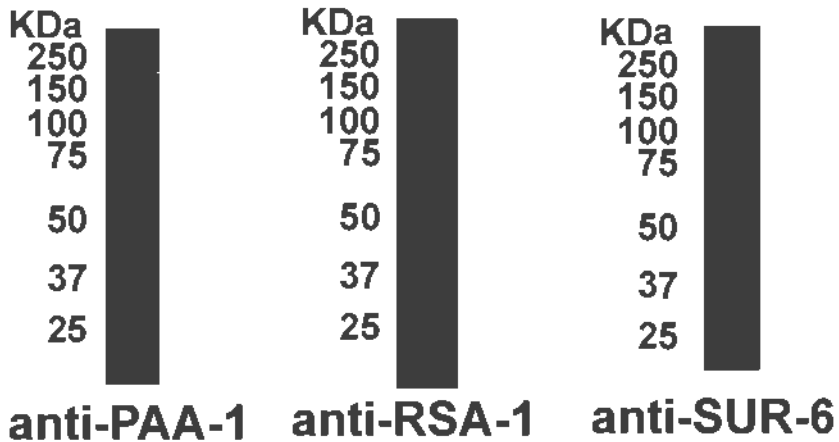

**Table S1. Results of yeast 2-hybrid screens using 13 segments of UNC-89B.**

| Bait             | Screening number | isolated clones (number of clones)                                                                       |
|------------------|------------------|----------------------------------------------------------------------------------------------------------|
| DH-PH            | 866200           | SPD-2 (3), VET-1 (2), UNC-22 (5)                                                                         |
| Ig4-7            | 1544200          | no                                                                                                       |
| KSP              | 525500           | no                                                                                                       |
| Ig8-13           | 1618100          | no                                                                                                       |
| Ig13-18          | 1803600          | F22F4.1 (13)                                                                                             |
| Ig18-23          | 1463100          | no                                                                                                       |
| Ig23-28          | 2371000          | no                                                                                                       |
| Ig28-33          | 2478000          | no                                                                                                       |
| Ig33-38          | 6080000          | no                                                                                                       |
| Ig38-43          | 5325000          | no                                                                                                       |
| Ig43-48          | 9725000          | no                                                                                                       |
| Ig48-51-Fn1-Ig52 | 1240000          | HIF-1 (95), HUM-6 (4), NHR-1 (5), T01B6.1 (2)                                                            |
| 1/3IK-Ig53-Fn2   | 11174000         | EPS-8 (2), GCK4 (7), KIN-18 (2), LIM-9 (12), LIN-13 (3), LIN-45 (3), PPTR-1 (4), PPTR-2 (2), T01B6.1 (3) |

**Table S2. New UNC-89 interactors summary**

| Protein | Isolated with    | Character                     | SAGE (muscle) | Promoter fusion  |                   | RNAi phenotype | Localization of GFP-MHC A upon RNAi | Localization of anti-MHC A             |
|---------|------------------|-------------------------------|---------------|------------------|-------------------|----------------|-------------------------------------|----------------------------------------|
|         |                  |                               |               | body wall muscle | pharyngeal muscle |                |                                     |                                        |
| VET-1   | DH-PH            |                               | ND            | ND               | ND                |                | normal                              | ND                                     |
| SPD-2   | DH-PH            | predicted coiled-coil domains | yes           | no               | no                | Emb            | abnormal (escaper)                  | slightly abnormal (ts mutant at 25° C) |
| UNC-22  | DH-PH            | twitchin                      | ND            | yes*             | yes*              | Twitching      | abnormal                            | ND                                     |
| F22F4.1 | Ig13-18          |                               | no            | ND               | ND                |                | slightly abnormal                   | normal (RNAi)                          |
| HIF-1   | Ig48-51-Fn1-Ig52 | hypoxia response              | yes           | ND               | ND                |                | normal                              | ND                                     |
| HUM-6   | Ig48-51-Fn1-Ig52 | myosin VII                    | yes           | ND               | ND                |                | normal                              | ND                                     |
| LIN-45  | 1/3IK-Ig53-Fn52  | raf kinase                    | no            | no               | no                | Emb            | normal (escaper)                    | normal (mutants)                       |
| LIN-13  | 1/3IK-Ig53-Fn52  | zinc finger                   | yes           | yes              | no                | Larval lethal  | normal                              | normal (mutants)                       |
| LIM-9** | 1/3IK-Ig53-Fn52  | FHL                           | yes           | yes              | yes               |                | dim***                              | ND                                     |
| T01B6.1 | 1/3IK-Ig53-Fn52  | APC domain                    | no            | ND               | ND                |                | abnormal/normal                     | normal (RNAi)                          |
| PPTR-1  | 1/3IK-Ig53-Fn52  | PP2A regulatory               | yes           | yes              | yes               | Emb            | abnormal (escaper)                  | abnormal (mutants)                     |
| PPTR-2  | 1/3IK-Ig53-Fn52  | PP2A regulatory               | yes           | yes              | no                |                | normal                              | normal (mutants)                       |
| EPS-8   | 1/3IK-Ig53-Fn52  | PTB, SH3, actin binding       | yes           | yes              | yes               | Emb            | abnormal (escaper)                  | normal (L1 feeding RNAi)               |
| KIN-18  | 1/3IK-Ig53-Fn52  | protein kinase                | no            | no               | yes               |                | normal                              | ND                                     |
| GCK-4   | 1/3IK-Ig53-Fn52  | protein kinase                | no            | no               | yes               | Larval lethal  | normal                              | ND                                     |

\*: Matsunaga et al., 2017

\*\* : Identified as UNC-89 interactor in Xiong et al., 2009

\*\*\*: Meissner et al., 2009

**Table S3. Phenotypes generated by *cash-1* RNAi.**

| <b>Phenotype:</b>          | <b>Unc<sup>1</sup></b> | <b>Vulval defects<sup>2</sup></b> | <b>Sterile</b> |
|----------------------------|------------------------|-----------------------------------|----------------|
| # experiments              | 6                      | 6                                 | 2              |
| # worms                    | 606                    | 606                               | 197            |
| % with phenotype (average) | 35%                    | 38%                               | 100%           |
| S. D.                      | 27%                    | 25%                               | na             |
| p value                    | 0.011                  | 0.004                             | na             |

<sup>1</sup>Unc, uncoordinated.

<sup>2</sup>Vulval defects include protruded vulva and extruded vulva.



**Table S4. Oligonucleotide primers used in this study**

| Name       | Property                   | Sequence                                |
|------------|----------------------------|-----------------------------------------|
| BamHI-Ig53 | UNC-89 Ig53, forward       | GCGGGATCCAATGATGATGGAACCTTTGCC          |
| Ig53-XhoI  | UNC-89 Ig53, reverse       | CGCCTCGAGTTAACGAGATGGAGTCTCTCCACT       |
| BamH-Fn2   | UNC-89 Fn2, forward        | GCGGGATCCCGACTGATAAGTGGAGAGACT          |
| Fn2-XhoI   | UNC-89 Fn2, reverse        | CGCCTCGAGTTAAATTTGCAACTTTGGTGCTCC       |
| PPTR01     | His tagged PPTR-1, forward | GCGGAATTC CATGGCGCTCATCAAAGATACTGCTGCA  |
| PPTR02     | His tagged PPTR-1, reverse | CGCGTCGACGGTACCTTATTTTTTTAGCCGGCGTCGTCG |
| PPTR03     | His tagged PPTR-2, forward | GCGGAATTC CATGGCGAATATTGGCCGAACAAACACG  |
| PPTR04     | His tagged PPTR-2, reverse | CGCCCCGGGGTACCTCACTGTTTCGTCGGTGCTAGT    |
| PPTR05     | PPTR-1 antigen, forward    | GCGCCCCGGGCAACGAGAAAAGGATCGTGAT         |
| PPTR06     | PPTR-1 antigen, reverse    | CGCGTCGACTTATTTTTTTAGCCGGCGTCGTCG       |
| PPTR07     | PPTR-2 antigen, forward    | GCGCCCCGGGACATTGAATGAAGAAAAGAA          |
| PPTR08     | PPTR-2 antigen, reverse    | CGCGTCGACTCACTGTTTCGTCGGTGCTAGT         |
| PPTR09     | paa-1 RNAi, forward        | GCGGTGACATGTCGGTTGTCGAAGAAGCC           |
| PPTR10     | paa-1 RNAi, reverse        | CGCGTCGACCCTTGCAACGTTGAGCAGTG           |
| PPTR11     | let-92 RNAi, forward       | GCGCTCGAGATGGCTGCTGCCCCACCATCT          |
| PPTR12     | let-92 RNAi, reverse       | CGCCTCGAGCTACAGGAAGTAGTCAGGCGT          |

Table S5. *C. elegans* strains used in this study

| strain name | genotype                                                                     | type of mutation                         | mammalian homologue                | biological phenotype**                 |
|-------------|------------------------------------------------------------------------------|------------------------------------------|------------------------------------|----------------------------------------|
| JH2787      | <i>pptr-1(tm3103)V</i>                                                       | genomic deletion                         | PP2A regulatory subunit (B') / B56 | slow growth                            |
| MAS264      | <i>pptr-1(abc19)V</i>                                                        | substitution (C95Y)                      | PP2A regulatory subunit (B') / B56 | not yet characterized                  |
| MAS268      | <i>pptr-2(ok1467)V</i>                                                       | genomic deletion                         | PP2A regulatory subunit (B') / B56 | no phenotype                           |
| MAS294      | <i>pptr-1(abc19) pptr-2(ok1467)V</i>                                         | substitution (C95Y) and genomic deletion | PP2A regulatory subunit (B') / B56 | not yet characterized                  |
| GB283       | <i>unc-89(tm752)I</i>                                                        | genomic deletion                         | obscurin                           | uncoordinated movement                 |
| RW79        | <i>unc-89(st79)I</i>                                                         | nonsense                                 | obscurin                           | uncoordinated movement                 |
| EU1062      | <i>sur-6(or550)I</i>                                                         | substitution (C302Y)                     | PP2A regulatory subunit (B)        | temperature sensitive embryonic lethal |
| TH322*      | <i>unc-13(e51) rsa-1(dd10) I/hT2 [bli-4(e937) let-?(q782) qls48] (I;III)</i> | substitution (Q340K in RSA-1a)           | PP2A regulatory subunit (B'')      | maternal effect embryonic lethal       |
| TH323*      | <i>unc-13(e51) rsa-1(dd13) I/hT2 [bli-4(e937) let-?(q782) qls48] (I;III)</i> | splice site                              | PP2A regulatory subunit (B'')      | maternal effect embryonic lethal       |
| BC347       | <i>unc-54(s74)I</i>                                                          | substitution (R270C)                     | myosin heavy chain                 | uncoordinated movement                 |
| RW5008      | <i>unc-54(s95)I</i>                                                          | substitution (G120R)                     | myosin heavy chain                 | uncoordinated movement                 |
| RW134       | <i>unc-54(st134)I</i>                                                        | substitution (S119F)                     | myosin heavy chain                 | uncoordinated movement                 |

\*: balanced strain of *rsa-1*

\*\* : as listed in Wormbase
